# The EEG multiverse of schizophrenia

**Authors:** Janir Ramos da Cruz<sup>1,2,a\*</sup>, Dario Gordillo<sup>1,a</sup>, Eka Chkonia<sup>3,4</sup>, Wei-Hsiang Lin<sup>1</sup>, Ophélie Favrod<sup>1</sup>, Andreas Brand<sup>1</sup>, Patrícia Figueiredo<sup>2</sup>, Maya Roinishvili<sup>4,5</sup>, and Michael H. Herzog<sup>1</sup>

## Affiliations:

<sup>1</sup>Laboratory of Psychophysics, Brain Mind Institute, École Polytechnique Fédérale de Lausanne (EPFL), Switzerland

<sup>2</sup>Institute for Systems and Robotics – Lisbon (LARSys) and Department of Bioengineering, Instituto Superior Técnico, Universidade de Lisboa, Portugal

<sup>3</sup>Department of Psychiatry, Tbilisi State Medical University, Tbilisi, Georgia

<sup>4</sup>Institute of Cognitive Neurosciences, Free University of Tbilisi, Tbilisi, Georgia

<sup>5</sup>Laboratory of Vision Physiology, Beritashvili Centre of Experimental Biomedicine, Tbilisi, Georgia

<sup>a</sup>These authors contributed equally

## \*Corresponding author:

Janir Ramos da Cruz, Laboratory of Psychophysics, Brain Mind Institute, School of Life Sciences, École Polytechnique Fédérale de Lausanne (EPFL), CH-1015 Lausanne, Switzerland

Phone number: +41 21 693 17 42

Email: [janir.ramos@epfl.ch](mailto:janir.ramos@epfl.ch)

## Abstract

Research on schizophrenia typically focuses on one paradigm, for which clear-cut abnormalities between patients and controls are established. Great care is taken to understand the underlying genetical, neurophysiological, and cognitive mechanisms, which eventually may explain the clinical outcome. This approach has led to many important hypotheses about the causes of schizophrenia. One tacit assumption of these *deep rooting* approaches is that paradigms tap into common and representative characteristics of the disease. Here, we analyzed resting-state electroencephalogram (EEG) of 121 schizophrenia patients and 75 age-matched controls, from which we extracted 194 features. Sixty-nine of these features showed significant group differences with medium to large effect sizes, indicating important abnormalities. To understand to what extent these features tap into the same aspects of the disorder, we computed both Pearson and partial least squares correlations. Surprisingly, correlations were very low, except for very similar features, where correlations were high, suggesting that most features are sensitive to different abnormalities. Using partial least squares regression, we show that combining the 69 features increases predictability of clinical outcomes by more than a factor of 5. We propose that complementing *deep* with *shallow* rooting approaches, where many roughly independent features are extracted from one paradigm (or several paradigms), will strongly improve diagnosis and potential treatment of schizophrenia.

## Introduction

Schizophrenia patients show strong abnormalities in many domains including personality, cognition, perception, and even immunology. In many experimental paradigms, the differences between patients and controls have large effect sizes, indicating that important aspects of the disease are detected. This provokes two questions: what do these abnormalities have in common, and how representative are they for the disease? For example, patients exhibit strong deficits in cognitive tasks, such as working memory tasks<sup>1</sup>, which are attributed to abnormalities of cortico-cerebellar-thalamic-cortical circuits<sup>2</sup>. Patients show also diminished skin flushing in niacin skin tests<sup>3</sup>, which is attributed to dysfunctional phospholipase A2 arachidonic acid signaling<sup>4</sup>. How do these working memory deficits correspond to deficits in skin functioning? Very few studies have correlated deficits with each other<sup>5-10</sup>. The Consortium on the Genetics of Schizophrenia studied neurocognitive and neurophysiological abnormalities in schizophrenia patients with a battery of 15 paradigms<sup>9</sup>. They found that neurocognitive measures shared a significant amount of variance while neurophysiological measures were almost entirely independent. Price and colleagues<sup>8</sup> studied four candidate electrophysiological endophenotypes of schizophrenia (mismatch negativity, P50, P300, and antisaccades). Even though patients *and* their family members showed deficits in each of these endophenotypes, the features were largely uncorrelated. Here, we took another road. Instead of comparing different paradigms, we analyzed the very same data of the very same patients with different electroencephalogram (EEG) analysis methods, including many that have shown strong atypical patterns in patients<sup>11-18</sup>.

## Results

For 121 patients (22 females,  $35.8 \pm 9.2$  years old,  $13.3 \pm 2.6$  years of education) and 75 age-matched healthy controls (39 females,  $35.1 \pm 7.7$  years old,  $15.1 \pm 2.9$  years of education; Table 1), we recorded 64-channel resting-state EEG for 5 minutes. During this period participants had their eyes closed, and did not engage in any task. We extracted in total 194 features from the EEG recordings, including time-domain features, frequency-domain and connectivity features, both in electrode and source space, and nonlinear dynamical features (Supplementary Table 1). Among the 194 EEG features, 69 showed significant differences between patients and controls with medium to large effect sizes (Cohen's *d* varied from 0.463 to 1.037, Figure 1).

It is made available under a [CC-BY-NC-ND 4.0 International license](https://creativecommons.org/licenses/by-nc-nd/4.0/).

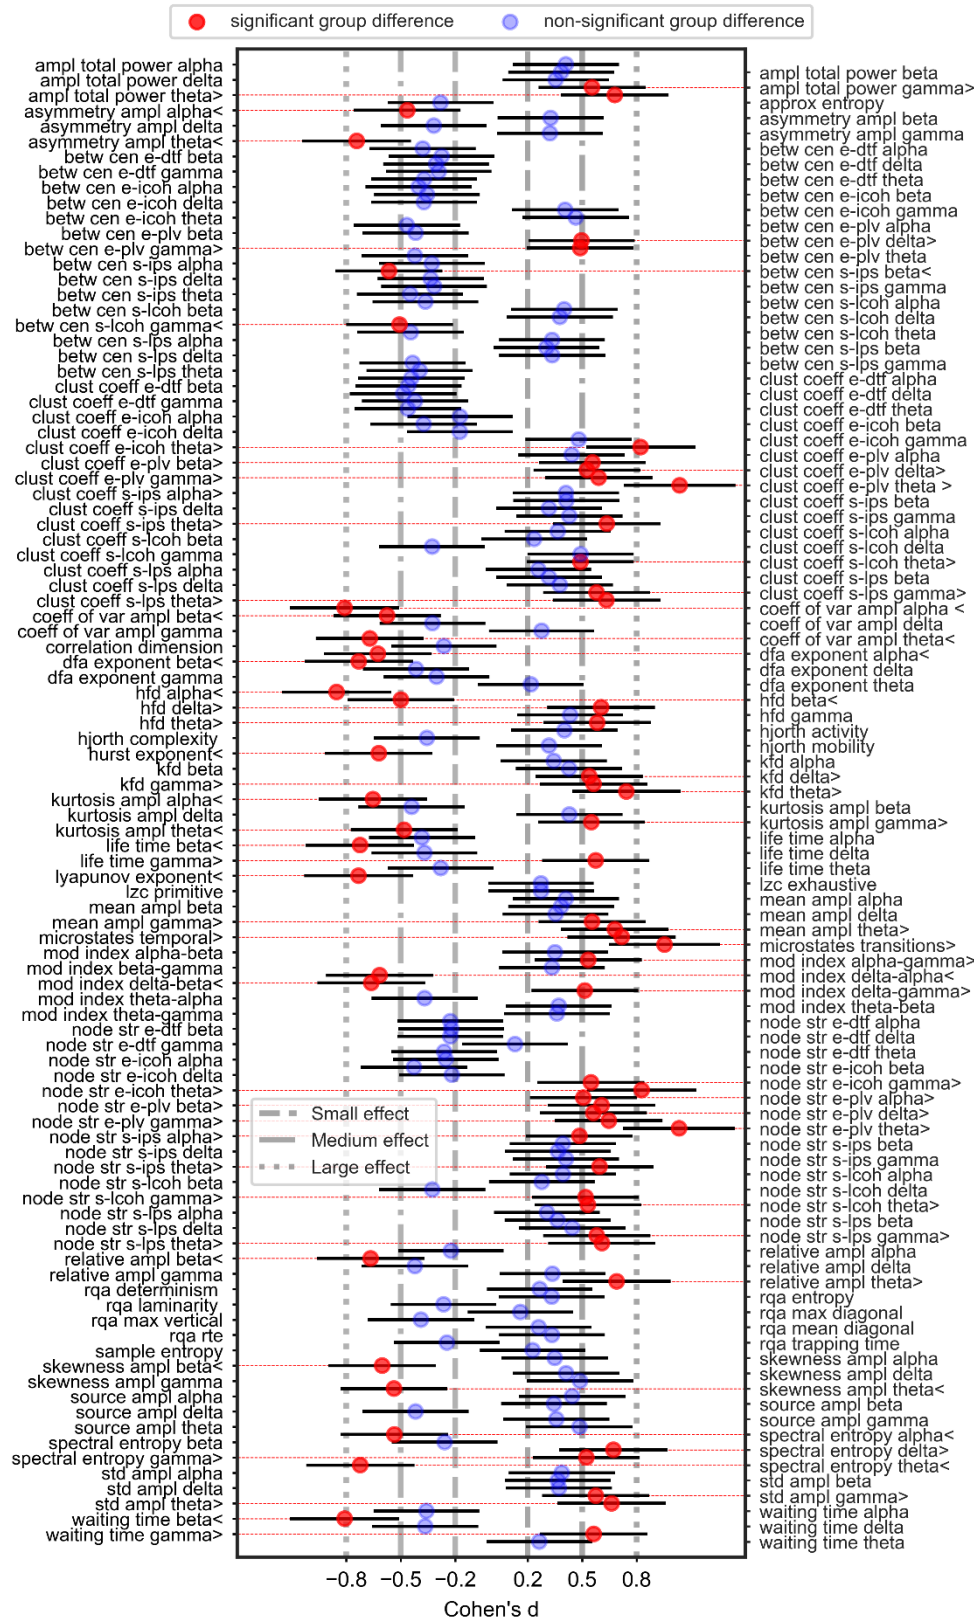

58

59

60

61

Figure 1. Effect size (Cohen's d) of the group differences between patients and controls for each of the 194 EEG features. We tested 157 features at the electrode level (each computed for 64 electrodes), 35 features at the source level (each computed for 80 brain regions), and 2 microstate features (each computed for 12 parameters). For each

It is made available under a [CC-BY-NC-ND 4.0 International license](#) .

62 feature, we conducted group comparisons with ANCOVAs (with gender as a factor and education as a co-variate),  
63 for each electrode, brain region, or microstate parameter. Multiple comparisons were corrected with false discovery  
64 rate (FDR). For each feature, we then took the values of the electrode, brain region, or microstate parameter with  
65 the largest effect size according to Cohen's  $d$  ( $\eta^2$  values were converted to Cohen's  $d$ ) to be the representative  
66 variable for this feature. Positive Cohen's  $d$  values mean that patients show higher feature values than controls,  
67 while negative Cohen's  $d$  values mean that controls show higher feature values than patients. Significant group  
68 differences, after correction for multiple comparisons, are depicted in red, with dotted red vertical lines serving as  
69 a guide to their labels.  $>$  and  $<$  were added to the feature labels to indicate if patients had significantly higher or  
70 lower values than controls, respectively. The non-significant effects are shown in blue. A list with the abbreviations  
71 and the corresponding name of each feature is presented in [Supplementary Table 1](#). Error bars represent 95%  
72 confidence intervals (C.I.).

73 Next, we wondered to what extent features that showed significant group differences are sensitive to the same aspects  
74 of the disorder. For this, we first computed Pearson's correlations between pairs of features (Figure 2). As the  
75 representative variable for each feature, we took the values of the electrode, brain region, or microstate parameter that  
76 showed the largest group difference according to Cohen's  $d$  (Figure 1). Surprisingly, we found that in the patients group  
77 only 36.02% of the pairwise correlations were significant at a level of 0.05 (without correcting for multiple comparisons).  
78 For the control group, only 26.64% of the correlations were significant. Since significance depends on the sample size,  
79 here, we focus on the magnitude of the correlation coefficients ( $r$ -values). In general, the magnitudes of the  $r$ -values were  
80 very low in both patients (0.055, 0.123, 0.250, for the 25<sup>th</sup>, 50<sup>th</sup>, and 75<sup>th</sup> percentiles, respectively) and controls (0.058,  
81 0.130, 0.243, for the 25<sup>th</sup>, 50<sup>th</sup>, and 75<sup>th</sup> percentiles, respectively; Figure 2). High correlations were found mainly for pairs  
82 of very closely related features, such as waiting-time statistics of gamma bursts (*waiting time gamma*) and life-time  
83 statistics of gamma bursts (*life time gamma*;  $r=0.836$  and  $r=0.926$ , in patients and controls, respectively).

It is made available under a [CC-BY-NC-ND 4.0 International license](https://creativecommons.org/licenses/by-nc-nd/4.0/).

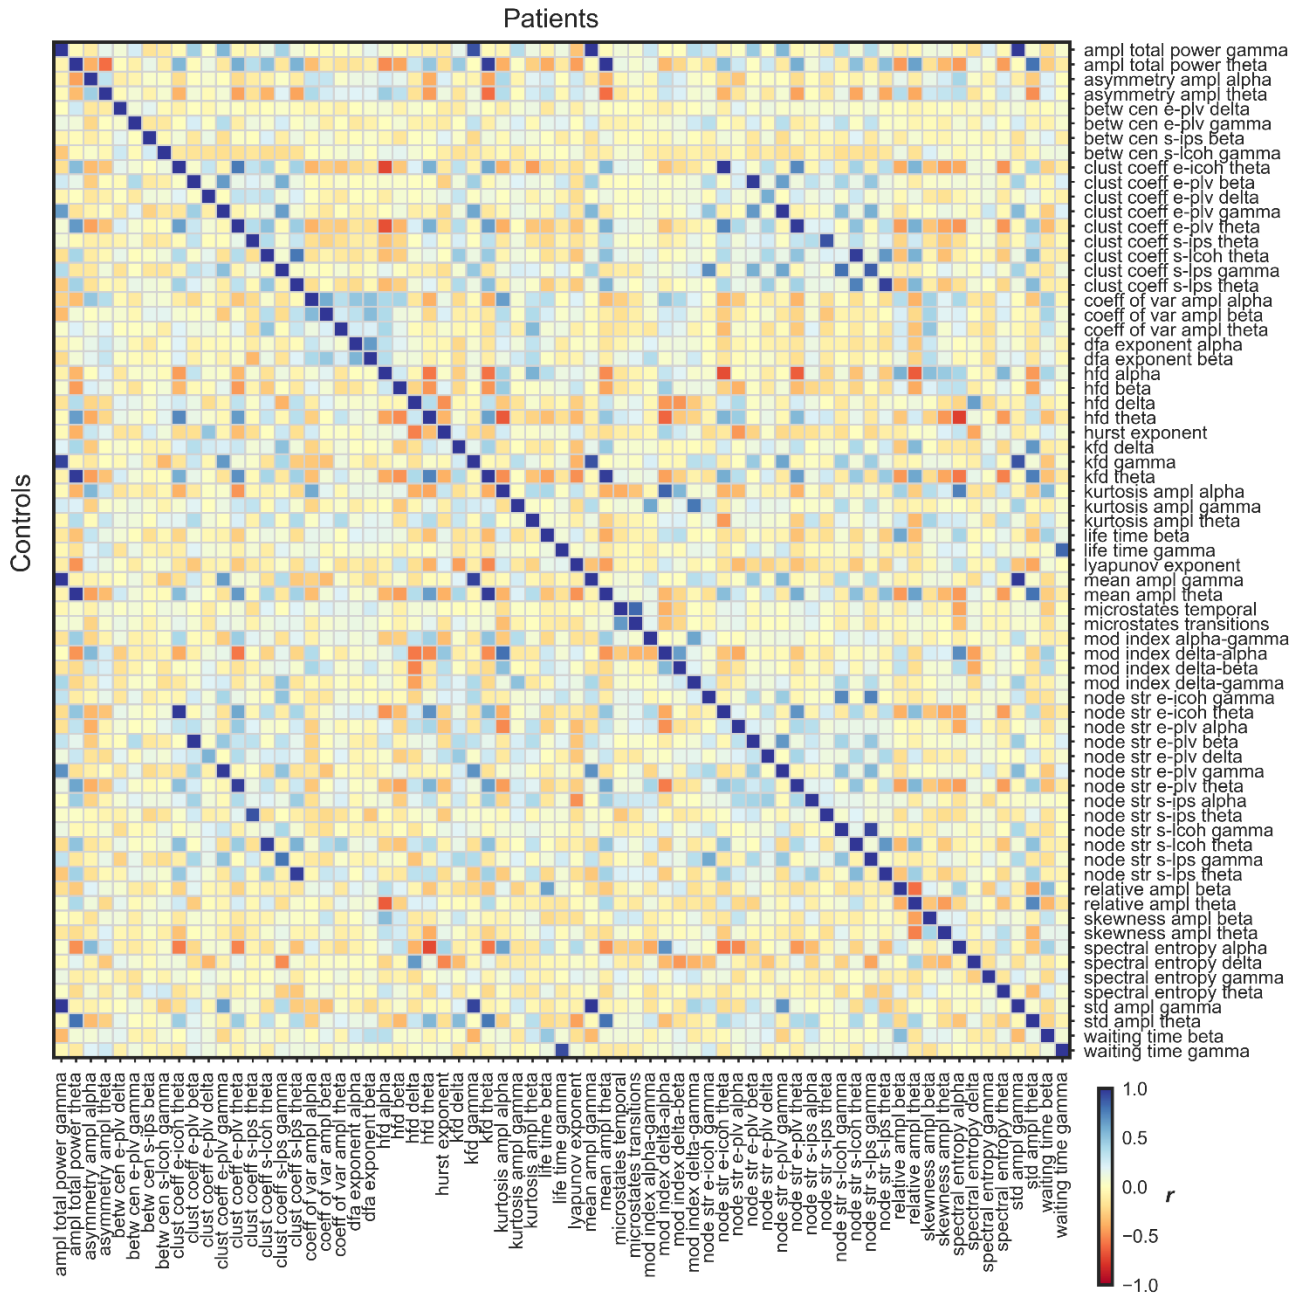

85 Figure 2. Pairwise correlations between the 69 EEG features that showed significant group differences between  
 86 patients and controls. Patients'  $r$ -values are presented in the upper triangle and controls'  $r$ -values are shown in the  
 87 lower triangle. Strong negative and positive  $r$ -values are depicted in red and blue, respectively, and  $r$ -values around  
 88 0 in yellow. For each feature, we used the values of the electrode, brain region, or microstate parameter that  
 89 showed the largest effect size as the representative variable for the correlations. In general, both patients and  
 90 controls showed low pairwise correlations between the different EEG features. A list with the abbreviations and  
 91 corresponding name of each feature is shown in [Supplementary Table 1](#).

92 Next, we wanted to have a closer look at the overall *shared information* between pairs of EEG features, which showed  
 93 significant group differences, by taking not only variables with the largest effect size into account but all variables of the  
 94 features. To this end, we used partial least squares correlation (PLSC), which is a multivariate statistical technique widely  
 95 used in neuroscience<sup>19</sup>. PLSC generalizes the principle of correlation between two variables to the *correlation* between

It is made available under a [CC-BY-NC-ND 4.0 International license](#) .

96 two matrices (here, pairs of EEG features)<sup>20-22</sup>. In brief, PLSC is based on the singular value decomposition of a matrix  
97 containing the dot product of two matrices comprising the normalized variables of features  $\mathbf{X}$  and  $\mathbf{Z}$ , respectively. The  
98 *shared information* between the two features is given by the inertia ( $\mathfrak{I}$ ), which is the sum of the singular values. The higher  
99 the inertia, the higher the amount of *shared information*. We normalized the inertias by the square-root of the product of  
100 the number of variables in the features  $\mathbf{X}$  and  $\mathbf{Z}$  (relative inertia;  $\mathfrak{I}_{relative}$ ). In this case, the relative inertias range from 0  
101 (the two features are completely unrelated) to 1 (the two features move together with a fixed proportion), which is akin  
102 to a correlation coefficient. We assessed the statistical significance of the inertia using permutation tests<sup>20</sup>. For details,  
103 see section Statistical Analyses. In patients, 56.05% of the pairwise inertias were significant (without correcting for  
104 multiple comparisons) and for controls, 40.32%. In general, relative inertias were not very high in both patients (0.255,  
105 0.329, 0.409, for the 25<sup>th</sup>, 50<sup>th</sup>, and 75<sup>th</sup> percentiles, respectively) and controls (0.306, 0.388, 0.472, for the 25<sup>th</sup>, 50<sup>th</sup>, and  
106 75<sup>th</sup> percentiles, respectively; Figure 3). As in the Pearson's correlation results, features that showed high associations  
107 were mainly similar features, such as the same network statistics for different connectivity measures in the theta band,  
108 for example, at the electrode level: clustering coefficient connectivity estimated with phase locking value (*clust coeff e-*  
109 *plv theta*) and with imaginary part of coherence (*clust coeff e-icoh theta*;  $\mathfrak{I}_{relative}=0.804$  and  $\mathfrak{I}_{relative}=0.826$ , in patients  
110 and controls, respectively).



It is made available under a [CC-BY-NC-ND 4.0 International license](https://creativecommons.org/licenses/by-nc-nd/4.0/).

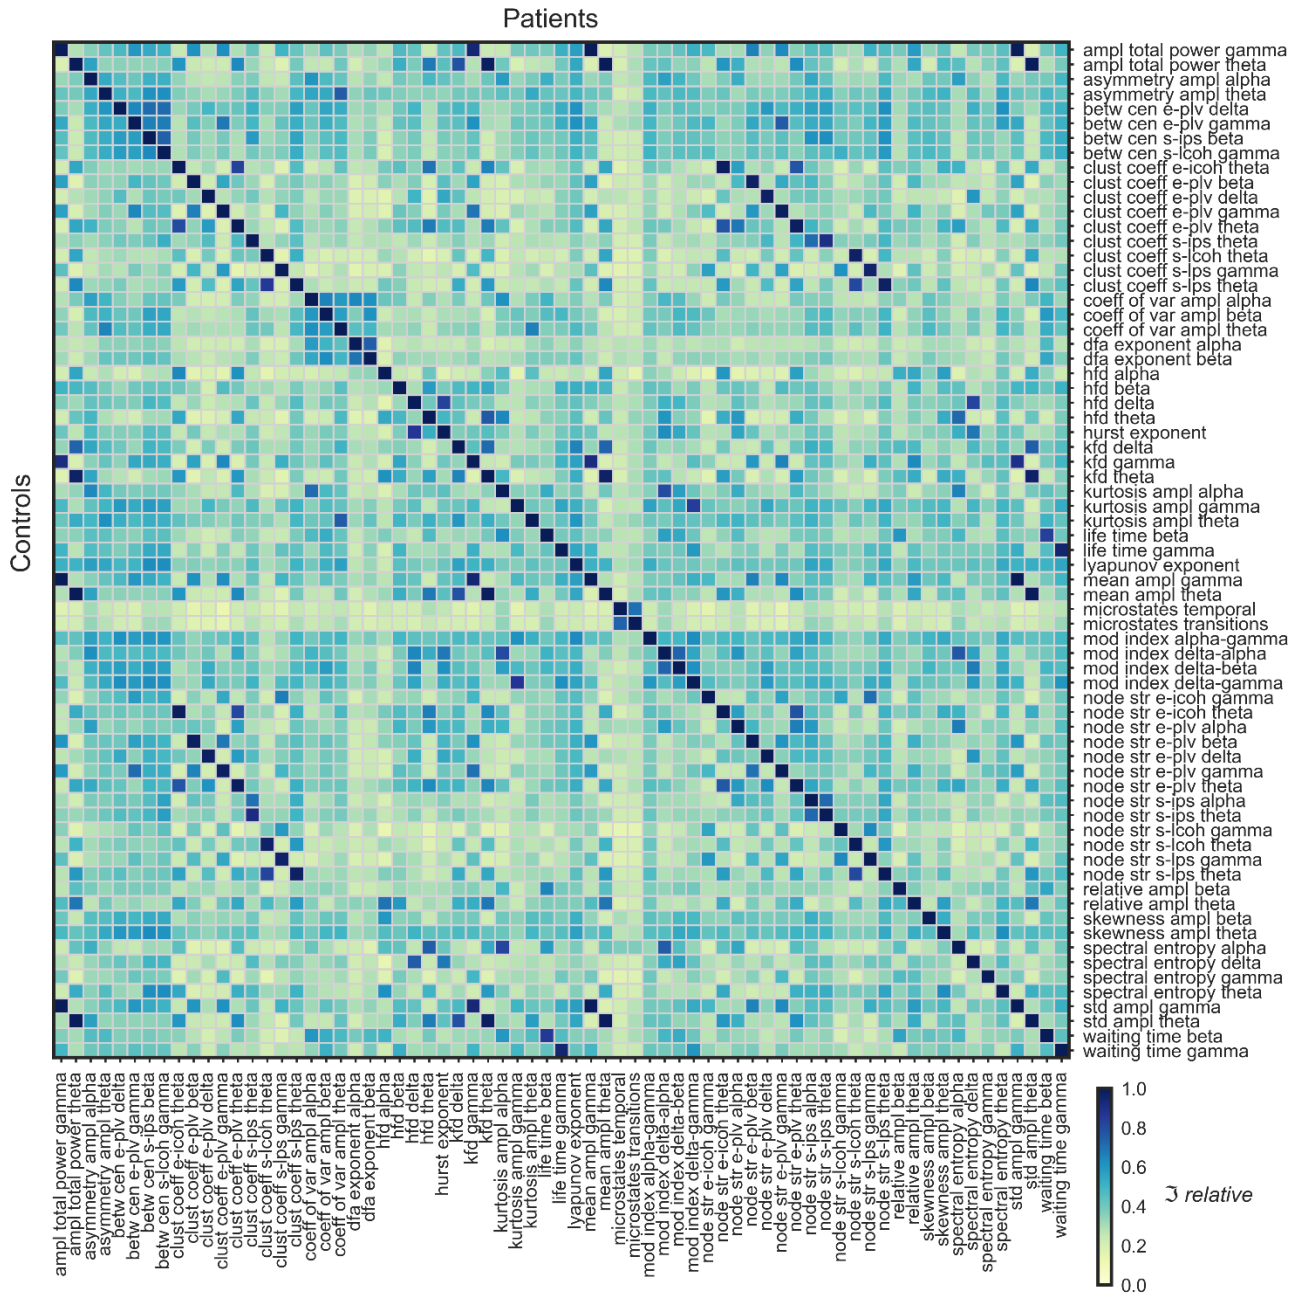

Figure 3. Shared information between the 69 EEG features that showed significant group differences, as measured by the relative inertia ( $\zeta_{relative}$ ) computed with partial least squares correlations (PLSC). The relative inertia ranges from 0 (two features are completely unrelated) to 1 (the two features' values move together by the exact same percentage). Patients' relative inertias are presented in the upper triangle and controls' relatives are shown in the lower triangle. In general, both patients and controls, showed relatively low relative inertias. A list with the abbreviations and corresponding name of each feature is shown in [Supplementary Table 1](#).

The next question was whether combining EEG features can improve predictability of clinical outcomes. We used partial least squares regression (PLSR) to predict the clinical outcomes as determined by the Scale for the Assessment of Positive Symptoms (SAPS) and the Scale for the Assessment of Negative Symptoms (SANS), which target positive (hallucinations, delusions, bizarre behavior, and positive formal thought disorder) and negative (affective flattening, alogia, apathy, anhedonia, and attention) symptoms, respectively. PLSR is an alternative to linear regression in situations where the

It is made available under a [CC-BY-NC-ND 4.0 International license](#) .

number of predictors is relatively large compared to the number of variables and when the predictors are highly correlated<sup>19,20</sup>. PLSR projects both the predicted variables (stored in **Y**) and the predictors (stored in **X**) into a new space formed by latent variables that simultaneously model **X** and predict **Y**. PLSR benefits from dimensionality reduction since it only uses a few latent variables. For details see section Statistical Analyses. In general, each of the 69 EEG features showed relatively weak predictive power of the clinical outcomes as determined by the Pearson's correlation and the root mean square error (RMSE) calculated between the observed and predicted scores (SANS:  $r=0.163\pm 0.117$ ,  $RMSE=5.097\pm 0.124$ ; SAPS:  $r=0.146\pm 0.108$ ,  $RMSE=3.111\pm 0.072$ ; [Supplementary Tables 2 and 3](#)). Since our results suggest that the EEG features are largely independent or weakly correlated, we expected that a combination of features would greatly improve the prediction of SAPS and SANS. We found that, indeed, the *multiverse* of EEG features led to a much higher predictive power (SANS:  $r=0.837$ ,  $RMSE=2.835$ ; SAPS:  $r=0.832$ ,  $RMSE=1.752$ ), namely a 5.114 and 5.711 times increase compared to the mean  $r$ -values and a 1.798 and 1.776 times decrease compared to the mean RMSE values, for SANS and SAPS, respectively.

## Discussion

Traditionally, schizophrenia research focuses on a single experimental paradigm and analysis method showing significant differences between patients and controls, and then tries to derive the underlying genetic or neurophysiological causes of the disorder. This approach has been quite successful in the formulation of hypotheses, such as the dopamine hypothesis<sup>23</sup>, the social brain hypothesis<sup>24</sup>, the glutamate hypothesis<sup>25</sup>, or the dysconnection hypothesis<sup>26</sup>, just to name a few. Here, we examined to what extent abnormalities quantified by different EEG analysis features correlate with each other. Many of the investigated features were previously linked to different abnormalities of brain processes in schizophrenia, and, here, we reproduced many of these results, such as imbalance in microstates dynamics<sup>13,27</sup>, decreased long-range temporal correlation in the alpha and beta bands<sup>16</sup>, decreased life- and waiting-times in the beta band<sup>17</sup>, increased spectral amplitude in the theta band<sup>12</sup>, increased connectivity in the theta band at the source level<sup>11,14</sup>, decreased Lyapunov exponent<sup>15</sup>, among others. With our systematic analysis, we found also abnormalities in EEG features, which, to the best of our knowledge, have not been reported yet, namely, delta-phase gamma-amplitude coupling, delta-phase alpha-amplitude coupling, range EEG coefficient of variation and asymmetry in the theta and alpha bands, etc. In some way, deeper analysis of each feature may have warranted an in-depth study and a potential publication. However, we did not want to elaborate on these methods individually because we wanted to understand how all EEG features relate to each other in their entirety. The surprising insight from our analysis is that, even though we are probing the same signals from the same participants, we found only weak correlations between the 69 significant features. The only high correlations were between features that are similar from the outset, thereby resembling test-retests. This suggests that none of the features is truly representative for the disease, but rather that all these features pick up more or less independent aspects of schizophrenia. Hence, the traditional approach of focusing on a single experimental paradigm and analysis method has its limitations. These results remind us that schizophrenia is indeed a very heterogeneous disease, a well-known fact, which is however not always taken seriously enough because, as mentioned above, most research tries to find the one or a few causes of schizophrenia within one well described paradigm by digging as deep as possible into the underlying neurophysiological and genetic mechanisms. In analogy to botany, one may call these approaches "deep rooting" approaches.

We propose that it may be useful to complement these deep rooting approaches with "shallow rooting" approaches, representing schizophrenia within a high-dimensional space, where many tests and analysis outcomes are the basis variables. The outcomes should ideally have large effect sizes, low mutual correlations, and a "flat" factor structure. Whether this is possible is an open question and depends very much on the underlying causes of schizophrenia. On the lowest complexity level, there may be only a few independent causes (or even only one), which were not found yet. Given



It is made available under a [CC-BY-NC-ND 4.0 International license](#) .

the heterogeneity of the disease, including abnormalities in the cognitive<sup>2</sup> but also the skin functioning domain<sup>4</sup>, the causes need to be on a rather general level, likely subcellular, present in all human functioning. Alternatively, schizophrenia may be an approximately “additive” disease, where many small abnormalities add up to severe symptoms. In an even more complex scenario, only certain combinations of redundant functions, each coming with at least two variants, cause the disease. For instance, if one function is up-regulated and another one down-regulated in an individual, there are no abnormalities. Deficits manifest only when all or most functions are either up- or down-regulated. In such a combinatorial scenario, it would be difficult to find the underlying causes since each variant itself does not lead to a deficit; only certain combinations do. Our correlation analyses (Figure 2 and Figure 3) provide some evidence for the additive scenario. This may be good news because combining measures can provide much better predictions on clinical outcomes than relying on a single feature (Supplementary Table 2). By combining all 69 features, we could indeed increase predictability of the positive and negative symptoms from 0.434 (for the best feature) to 0.837 (all 69 features) – notably with the very same resting-state paradigm, thus reducing the testing burden for patients. In the next steps, it will be important to find the right set of tests, which may include cognitive tests but also potentially immunological markers - of which each may contribute with a variety of analysis methods.

Our results are in line with recent results in magnetic resonance imaging<sup>28</sup> and genetics<sup>29</sup> studies, which have shown that combining measures, such as in polygenic risk scores, can largely improve predictions<sup>28</sup>. However, even though we used cross-validation techniques to avoid overfitting, we cannot exclude that the PLSR results are too optimistic since we do not have an independent testing set. Also, there are demographic differences between patients and controls, which might affect our group comparisons. However, we attempted to minimize these demographic effects by using education as a covariate and gender as factor in the analyses. Similarly, we cannot exclude effects of medication in our results. Nonetheless, we find similar patterns of correlations between EEG features, i.e., weak associations, in both patients and controls, suggesting that if there is an effect of medication, it is small.

Our results may explain a deep mystery in schizophrenia research. Schizophrenia has an estimated heritability of 70 to 85%<sup>30</sup>. For example, the chance to also suffer from schizophrenia for monozygotic twins is about 33% when the partner twin has the disease<sup>31</sup>. Furthermore, about 0.25 to 0.75% people of a population suffer from schizophrenia and related psychotic disorders<sup>32–34</sup>. These values are rather stable across cultures<sup>35</sup>. Given that schizophrenia patients have less offspring<sup>36–39</sup>, this provokes the question why schizophrenia has not been extinguished during the course of evolution<sup>38,40</sup>. In the above-mentioned combinatorial scenario with many redundant functions this may simply happen because evolution operates on the individual single-nucleotide polymorphism (SNP) level and not on the combinatorial one. As long as most of the population shows average functioning, there will be no change of the allele distributions. In the additive scenario, evolution may extinct harmful alleles, of which each constitutes only a little risk, very slowly and these may be replaced by harmful de novo mutations<sup>38</sup>. To what extent such considerations hold true will be shown by shallow rooting approaches using a plethora of paradigms and a multiverse of analysis methods. In a nutshell, deep rooting will help to understand the different aspects of the disorder, while shallow rooting will help to better diagnose schizophrenia by finding subpopulations, leading to more personalized treatment.

## Methods

### Participants

Two groups of participants joined the experiment: schizophrenia patients (n=121) and healthy controls (n=75). All participants took part in a battery of tests comprising perceptual and cognitive tasks as well as EEG recordings. Data of 101 patients and 75 controls have already been published in different contexts<sup>13,41–43</sup>, while data of the other 20 participants have not been published yet. Patients were recruited from the Tbilisi Mental Health Hospital or the psycho-

It is made available under a [CC-BY-NC-ND 4.0 International license](#) .

social rehabilitation center. Patients were invited to participate in the study when they had recovered sufficiently from an acute psychotic episode. Thirty-five were inpatients and 86 were outpatients. Patients were diagnosed using the Diagnostic and Statistical Manual of Mental Disorders Fourth Edition (DSM-IV) by means of an interview based on the Structured Clinical Interview for DSM-IV, Clinical Version, information from staff, and study of patients' records. Psychopathology of patients was assessed by an experienced psychiatrist using the Scale for the Assessment of Negative Symptoms (SANS) and the Scale for the Assessment of Positive Symptoms (SAPS). Out of the 121 patients, 106 were receiving neuroleptic medication. Chlorpromazine (CPZ) equivalents are indicated in Table 1. Controls were recruited from the general population in Tbilisi, aiming to match patients' demographics as closely as possible. All controls were free from psychiatric axis I disorders and had no family history of psychosis. General exclusion criteria were alcohol or drug abuse, severe neurological incidents or diagnoses, developmental disorders (autism spectrum disorder or intellectual disability), or other somatic mind-altering illnesses, assessed through interview by certified psychiatrists. All participants were no older than 55 years. Group characteristics are presented in Table 1. Since patients and controls differed in terms of gender and education, gender was used as factor while education was used as a covariate in subsequent group comparisons.

All participants signed informed consent and were informed that they could quit the experiment at any time. All procedures complied with the Declaration of Helsinki (except for pre-registration) and were approved by the Ethical Committee of Institute of Postgraduate Medical Education and Continuous Professional Development (Georgia). Protocol number: 09/07. Title: "Genetic polymorphisms and early information processing in schizophrenia".

Table 1 - Group average statistics ( $\pm$ SD)

|                             | Patients          | Controls       | Statistics                       |
|-----------------------------|-------------------|----------------|----------------------------------|
| Gender (F/M)                | 22/99             | 39/36          | $\chi^2(1)=24.702, p=6.690e-7^b$ |
| Age (years)                 | $35.8 \pm 9.2$    | $35.1 \pm 7.7$ | $t(194)=0.519, p=0.604^c$        |
| Education (years)           | $13.3 \pm 2.6$    | $15.1 \pm 2.9$ | $t(194)=-4.418, p=1.657e-5^c$    |
| Handedness (L/R)            | 6/115             | 4/71           | $\chi^2(1)=0.013, p=0.908^b$     |
| Illness duration (years)    | $10.8 \pm 8.7$    |                |                                  |
| SANS                        | $10.1 \pm 5.2$    |                |                                  |
| SAPS                        | $8.6 \pm 3.2$     |                |                                  |
| CPZ equivalent <sup>a</sup> | $561.1 \pm 389.4$ |                |                                  |

SANS - Scale for the Assessment of Negative Symptoms, SAPS - Scale for Assessment of Positive, CPZ - chlorpromazine  
<sup>a</sup>Average CPZ equivalents calculated over the 106 Patients receiving neuroleptic medication  
<sup>b</sup>Pearson's chi-squared test  
<sup>c</sup>Two-sided independent samples *t*-test

## EEG recording and data processing

Participants were sitting in a dim lit room. They were instructed to keep their eyes closed and to relax for 5 minutes. Resting-state EEG was recorded using a BioSemi Active Two Mk2 system (Biosemi B.V., The Netherlands) with 64 Ag-AgCl sintered active electrodes, referenced to the common mode sense electrode. The recording sampling rate was 2048 Hz. Offline data were downsampled to 256 Hz and preprocessed using an automatic pipeline<sup>44</sup>. See [Supplementary Methods](#) for details.

## 231 Statistical Analyses

232 First, we compared patients' and controls' scores for each of the 194 EEG features. For each of  $J$  variables (64 electrodes,  
233 80 brain regions, or 12 microstate parameters depending on the number of variables of each EEG feature) of a given  
234 feature, we performed a two-way ANCOVA, with Group (patients and controls) and Gender (male and female) as factors  
235 and Education as a covariate.  $P$ -values for the effect of Group were corrected for  $J$  comparisons using False Discovery Rate  
236 (FDR; with an error rate of 5%). Group effects'  $\eta^2$  were converted to Cohen's  $d$ .

237 Second, for each EEG feature that showed at least one variable with a significant effect (after correcting for multiple  
238 comparisons), we used the variable (electrode, brain region, or microstate parameter) with the biggest effect size to be  
239 the representative variable for that feature. We then used Pearson correlations to estimate the pairwise correlations  
240 between the representative variables of each of the significant EEG features. The correlation analysis was done for patients  
241 and controls separately.

242 Third, to quantify the overall relationship, i.e., the amount of *shared information*, between pairs of multivariate EEG  
243 features, we used Partial Least Squares Correlation (PLSC). PLSC is the generalization of the correlation between two  
244 variables to two matrices<sup>21,22</sup>. Let  $\mathbf{X}$  be an  $N \times J$  matrix, containing the data of  $N$  participants (121 patients or 75 controls)  
245 for all  $J$  variables (64 electrodes, 80 brain regions, or 12 microstate parameters) of a certain EEG feature (alpha, beta, etc.),  
246 and  $\mathbf{Z}$  be an  $N \times K$  matrix, containing data of the  $N$  participants for all  $K$  variables (64 electrodes, 80 brain regions, or 12  
247 microstate parameters) of another EEG feature. With both  $\mathbf{X}$  and  $\mathbf{Z}$  mean-centered and normalized, the pattern of  
248 relationship between the columns of  $\mathbf{X}$  and  $\mathbf{Z}$  can be stored in a  $K \times J$  cross-product correlation matrix, denoted  $\mathbf{R}$ ,  
249 computed as:

$$\mathbf{R} = \mathbf{Z}^T \mathbf{X} \quad (1)$$

250

251 The goal of PLSC is to analyze the *shared information* between  $\mathbf{X}$  and  $\mathbf{Z}$ , which is stored in the matrix  $\mathbf{R}$ . This is done by  
252 deriving two sets of latent variables, one for  $\mathbf{X}$  and another for  $\mathbf{Z}$ , that are linear combinations of the respective original  
253 variables. These latent variables are computed in order to obtain the maximal covariance between  $\mathbf{X}$  and  $\mathbf{Z}$ . The original  
254 variables are described by their *saliences*, which are similar to loadings in principal components analysis<sup>19</sup>. This is achieved  
255 by the singular value decomposition (SVD) of the correlation matrix  $\mathbf{R}$ :

$$\mathbf{R} = \mathbf{U} \Delta \mathbf{V}^T \quad (2)$$

256

257 where  $\mathbf{U}$  is the  $J \times L$  matrix of  $\mathbf{X}$ -saliences and  $\mathbf{V}$  is the  $K \times L$  matrix of  $\mathbf{Z}$ -saliences, while  $\Delta$  is the  $L \times L$  diagonal matrix of  
258 the  $L$  singular values (with  $L$  being the rank of  $\mathbf{R}$ ).

259 The quantity of *shared information* between  $\mathbf{X}$  and  $\mathbf{Z}$  can be directly quantified as the *inertia* common to the two  
260 features<sup>19</sup>. The inertia, denoted  $\mathfrak{S}$ , is defined as:

$$\mathfrak{S} = \sum_{l=1}^L \delta_l \quad (3)$$

261

262 where  $\delta_l$  is the  $l^{\text{th}}$  diagonal element, i.e., singular value, of  $\Delta$ , and  $L$  is the number of non-zero singular values of  $\mathbf{R}$ , i.e.,  
263 the rank of the correlation matrix.

It is made available under a [CC-BY-NC-ND 4.0 International license](https://creativecommons.org/licenses/by-nc-nd/4.0/) .

264 The statistical significance of the inertia is assessed using a permutation test<sup>20,45</sup>. A permutation sample is created by  
265 shuffling the rows of  $\mathbf{X}$  (i.e., the participants) while keeping  $\mathbf{Z}$  fixed. Then PLSC is used to recompute a new value of inertia  
266 for the permuted sample. This procedure is repeated 10,000 times, which produces a null distribution of inertias that  
267 can be used for null hypothesis testing. The  $p$ -values are given by counting how many times the permuted inertias were  
268 larger than the original inertia and dividing by the number of permutations (10,000).

269 Here, since some EEG features have different numbers of variables (64 electrodes, 80 brain regions, or 12 microstates  
270 parameters), within and across the pairwise comparisons, which results in different orders of the  $\mathbf{R}$  matrix, we normalized  
271 the inertias for better comparability across pairwise comparisons of EEG features. In essence, we divided the computed  
272 inertias by the square-root of the product of dimensions of the  $\mathbf{R}$  matrix ( $\sqrt{K \times J}$ )<sup>46</sup>, resulting in relative inertias  
273 ( $\mathfrak{I}_{relative}$ ). In this case, the inertias range from 0 ( $\mathbf{X}$  and  $\mathbf{Z}$  are completely unrelated) to 1 ( $\mathbf{X}$  and  $\mathbf{Z}$  are basically the same).

274 Last, to predict patients' psychopathology scores (SANS and SAPS) based on the EEG features, we used Partial Least  
275 Squares Regression (PLSR). PLSR is a multivariate high-dimensional regression method that has been widely used in  
276 predicting behavioral scores based on neuroimaging data<sup>19</sup>. Since PLSR can handle regression problems where the number  
277 of predictors is relatively large compared to the number of samples as well as multicollinearity (i.e., when the predictors  
278 are not linearly independent) by dimensionality reduction, PLSR is a very versatile tool to study brain-behavior  
279 relationships<sup>19,45</sup>. The predictors (in our case, the variables of a given EEG feature) are stored in a  $N \times J$  matrix  $\mathbf{X}$  and the  
280 predicted variables (in our case, SANS or SAPS) are stored in a  $N \times M$  matrix  $\mathbf{Y}$ , where  $N$  is the number of participants  
281 (121 patients),  $J$  is the number of predictors (64 electrodes, 80 brain regions, 12 microstates parameters, or the variables  
282 of all features together), and  $M$  is the number of predicted variables. Here, since we predicted SANS and SAPS separately,  
283  $M$  is 1.  $\mathbf{X}$  is mean-centered and normalized. PLSR projects both the predictors and the predicted variables into a new space  
284 formed by latent variables stored in a matrix  $\mathbf{T}$  that simultaneously models  $\mathbf{X}$  and predicts  $\mathbf{Y}$ . This is expressed as a double  
285 decomposition of  $\mathbf{X}$  and the predicted  $\mathbf{Y}$  ( $\hat{\mathbf{Y}}$ ):

$$\mathbf{X} = \mathbf{TP}^T \text{ and } \hat{\mathbf{Y}} = \mathbf{TBC}^T \quad (4)$$

286

287 where  $\mathbf{P}$  and  $\mathbf{C}$  are loadings, while  $\mathbf{B}$  is a diagonal matrix. If we let  $\mathbf{B}_{PLS} = \mathbf{P}^{T+}\mathbf{BC}$ , where  $\mathbf{P}^{T+}$  is the pseudo-inverse of  $\mathbf{P}^T$   
288 and  $\mathbf{B}_{PLS}$  is a  $J \times M$  matrix equivalent to the regression weights of a multiple regression,  $\hat{\mathbf{Y}}$  can be expressed as a regression  
289 model:

$$\hat{\mathbf{Y}} = \mathbf{XB}_{PLS} \quad (5)$$

290

291 In PLSR, the latent variables are computed by applying SVD iteratively. At each iteration of the SVD, orthogonal latent  
292 variables and corresponding coefficients are produced. There are many algorithms that solve the PLSR problem<sup>47</sup>. Here,  
293 we used the Nonlinear Iterative Partial Least Squares (NIPALS) as implemented in Scikit-learn 0.21.3<sup>48</sup>.

294 Since in our study the number of predictors is relatively large compared to the number of observations, especially when  
295 we aggregate the variables of all the EEG features, PLSR will most likely overfit the data (i.e., perform well in training data  
296 but poorly in new observations). To avoid overfitting, we resorted to leave-one-out cross-validation (LOOCV)<sup>49</sup>. We  
297 conducted the LOOCV in two steps: 1) select the number of latent variables, and 2) select the predictors. In the LOOCV  
298 procedure, the testing set consists of only one participant. Each participant is removed from  $\mathbf{X}$  and  $\mathbf{Y}$ , and a PLSR model is  
299 computed for the remaining participants. Then the PLSR model is used to predict the left-out participant's  $\mathbf{Y}$  value from  
300 their  $\mathbf{X}$  values. The  $N$  predicted values are stored in  $\tilde{\mathbf{Y}}$ . The quality of the prediction on unseen data is given by the  
301 Predicted Residual Estimated Sum of Squares (PRESS), which is formally defined as<sup>47</sup>:

It is made available under a [CC-BY-NC-ND 4.0 International license](#) .

$$\text{PRESS} = \|\mathbf{Y} - \tilde{\mathbf{Y}}\|^2 \quad (6)$$

302

303 where  $\|\cdot\|^2$  is the sum of squares of all elements in this matrix (the smaller the PRESS the better). The number of latent  
304 variables at which the PRESS starts increasing gives an indication of the optimal number of latent variables to be kept in  
305 the model<sup>47</sup>. After fixing the number of latent variables to be kept, we used recursive feature elimination (RFE)<sup>50</sup> with  
306 LOOCV to optimize the model performance on unseen data. Note that, here, the features in RFE are what we refer to as  
307 variables or predictors. In RFE, we build a model on the entire set of predictors to get an importance score for each  
308 predictor, in our case, the regression coefficients in the PLSR model. Then, the least important predictor, i.e., with the  
309 smallest absolute regression coefficient, is removed, the model is re-built and the importance scores are re-computed. By  
310 using PRESS as a criterion, this procedure is repeated until the PRESS starts increasing. The subset of predictors with the  
311 smallest PRESS is then used to train the final model. Finally, we reported the predictive performance of the PLSR model as  
312 the Pearson's correlation coefficient and the root-mean square error (RMSE) between the observed  $\mathbf{Y}$  and the leave-one-  
313 out predicted  $\tilde{\mathbf{Y}}$ .

## 314 Data Availability

315 The data that support the findings of this study are available upon reasonable request.

## 316 Code Availability

317 The code that support the findings of this study are available upon request.

## 318 Acknowledgments

319 This work was partially funded by the Fundação para a Ciência e a Tecnologia under grant FCT PD/BD/105785/2014 and  
320 the National Centre of Competence in Research (NCCR) Synapsy financed by the Swiss National Science Foundation  
321 under grant 51NF40-185897. We would like to thank Marc Repnow for his comments on the manuscript and Ben  
322 Lönnqvist for proofreading the manuscript.

## 323 Author Contributions

324 M.H.H., E.C., A.B., and M.R. designed the research; M.R. and E.C. performed the research; J.R.C., D.G., W.H.L., and O.F.  
325 analyzed data; J.R.C., D.G., O.F. A.B., P.F., and M.H.H. wrote the paper.

## 326 Competing Interests

327 The authors declare no competing interests.

## 328 References

- 329 1. Meyer-Lindenberg, A. *et al.* Evidence for Abnormal Cortical Functional Connectivity During Working Memory in  
330 Schizophrenia. *Am. J. Psychiatry* **158**, 1809–1817 (2001).
- 331 2. Andreasen, N. C., Paradiso, S. & O'Leary, D. S. 'Cognitive Dysmetria' as an Integrative Theory of Schizophrenia: A  
332 Dysfunction in Cortical-Subcortical-Cerebellar Circuitry? *Schizophr. Bull.* **24**, 203–218 (1998).
- 333 3. Rybakowski, J. & Weterle, R. Niacin test in schizophrenia and affective illness. *Biol. Psychiatry* **29**, 834–836 (1991).



It is made available under a [CC-BY-NC-ND 4.0 International license](https://creativecommons.org/licenses/by-nc-nd/4.0/).

- 334 4. Messamore, E. Niacin subsensitivity is associated with functional impairment in schizophrenia. *Schizophr. Res.* **137**,  
335 180–184 (2012).
- 336 5. Braff, D. L., Freedman, R., Schork, N. J. & Gottesman, I. I. Deconstructing Schizophrenia: An Overview of the Use of  
337 Endophenotypes in Order to Understand a Complex Disorder. *Schizophr. Bull.* **33**, 21–32 (2007).
- 338 6. Braff, D. L., Light, G. A. & Swerdlow, N. R. Prepulse Inhibition and P50 Suppression Are Both Deficient but not  
339 Correlated in Schizophrenia Patients. *Biol. Psychiatry* **61**, 1204–1207 (2007).
- 340 7. Dickinson, D., Goldberg, T. E., Gold, J. M., Elvevag, B. & Weinberger, D. R. Cognitive Factor Structure and Invariance in  
341 People With Schizophrenia, Their Unaffected Siblings, and Controls. *Schizophr. Bull.* **37**, 1157–1167 (2011).
- 342 8. Price, G. W. *et al.* A Multivariate Electrophysiological Endophenotype, from a Unitary Cohort, Shows Greater Research  
343 Utility than Any Single Feature in the Western Australian Family Study of Schizophrenia. *Biol. Psychiatry* **60**, 1–10  
344 (2006).
- 345 9. Seidman, L. J. *et al.* Factor structure and heritability of endophenotypes in schizophrenia: Findings from the  
346 Consortium on the Genetics of Schizophrenia (COGS-1). *Schizophr. Res.* **163**, 73–79 (2015).
- 347 10. Toomey, R. *et al.* Association of neuropsychological vulnerability markers in relatives of schizophrenic patients.  
348 *Schizophr. Res.* **31**, 89–98 (1998).
- 349 11. Andreou, C. *et al.* Resting-state theta-band connectivity and verbal memory in schizophrenia and in the high-risk state.  
350 *Schizophr. Res.* **161**, 299–307 (2015).
- 351 12. Boutros, N. N. *et al.* The status of spectral EEG abnormality as a diagnostic test for schizophrenia. *Schizophr. Res.* **99**,  
352 225–237 (2008).
- 353 13. da Cruz, J. R. *et al.* EEG microstates are a candidate endophenotype for schizophrenia. *Nat. Commun.* **11**, (2020).
- 354 14. Di Lorenzo, G. *et al.* Altered resting-state EEG source functional connectivity in schizophrenia: the effect of illness  
355 duration. *Front. Hum. Neurosci.* **9**, (2015).
- 356 15. Kim, D.-J. *et al.* An estimation of the first positive Lyapunov exponent of the EEG in patients with schizophrenia.  
357 *Psychiatry Res. Neuroimaging* **98**, 177–189 (2000).
- 358 16. Nikulin, V. V., Jönsson, E. G. & Brismar, T. Attenuation of long-range temporal correlations in the amplitude dynamics  
359 of alpha and beta neuronal oscillations in patients with schizophrenia. *NeuroImage* **61**, 162–169 (2012).
- 360 17. Sun, J. *et al.* Abnormal Dynamics of EEG Oscillations in Schizophrenia Patients on Multiple Time Scales. *IEEE Trans.*  
361 *Biomed. Eng.* **61**, 1756–1764 (2014).
- 362 18. Uhlhaas, P. J. & Singer, W. Abnormal neural oscillations and synchrony in schizophrenia. *Nat. Rev. Neurosci.* **11**, 100–  
363 113 (2010).
- 364 19. Krishnan, A., Williams, L. J., McIntosh, A. R. & Abdi, H. Partial Least Squares (PLS) methods for neuroimaging: A tutorial  
365 and review. *NeuroImage* **56**, 455–475 (2011).
- 366 20. Abdi, H. & Williams, L. J. Partial Least Squares Methods: Partial Least Squares Correlation and Partial Least Square  
367 Regression. in *Computational Toxicology* (eds. Reisfeld, B. & Mayeno, A. N.) vol. 930 549–579 (Humana Press, 2013).
- 368 21. McIntosh, A. R., Bookstein, F. L., Haxby, J. V. & Grady, C. L. Spatial Pattern Analysis of Functional Brain Images Using  
369 Partial Least Squares. *NeuroImage* **3**, 143–157 (1996).
- 370 22. Tucker, L. R. An inter-battery method of factor analysis. *Psychometrika* **23**, 111–136 (1958).
- 371 23. Howes, O. D. & Kapur, S. The Dopamine Hypothesis of Schizophrenia: Version III--The Final Common Pathway.  
372 *Schizophr. Bull.* **35**, 549–562 (2009).
- 373 24. Burns, J. The social brain hypothesis of schizophrenia. *World Psychiatry Off. J. World Psychiatr. Assoc. WPA* **5**, 77–81  
374 (2006).
- 375 25. Hu, W., MacDonald, M. L., Elswick, D. E. & Sweet, R. A. The glutamate hypothesis of schizophrenia: evidence from  
376 human brain tissue studies. *Ann. N. Y. Acad. Sci.* **1338**, 38–57 (2015).
- 377 26. Friston, K., Brown, H. R., Siemerikus, J. & Stephan, K. E. The dysconnection hypothesis (2016). *Schizophr. Res.* **176**, 83–  
378 94 (2016).

It is made available under a [CC-BY-NC-ND 4.0 International license](https://creativecommons.org/licenses/by-nc-nd/4.0/) .

- 379 27. Rieger, K., Diaz Hernandez, L., Baenninger, A. & Koenig, T. 15 Years of Microstate Research in Schizophrenia – Where  
380 Are We? A Meta-Analysis. *Front. Psychiatry* **7**, (2016).
- 381 28. Cole, J. H. Multimodality neuroimaging brain-age in UK biobank: relationship to biomedical, lifestyle, and cognitive  
382 factors. *Neurobiol. Aging* **92**, 34–42 (2020).
- 383 29. Stefansson, H. *et al.* Common variants conferring risk of schizophrenia. *Nature* **460**, 744–747 (2009).
- 384 30. Burmeister, M., McInnis, M. G. & Zöllner, S. Psychiatric genetics: progress amid controversy. *Nat. Rev. Genet.* **9**, 527–  
385 540 (2008).
- 386 31. Hilker, R. *et al.* Heritability of Schizophrenia and Schizophrenia Spectrum Based on the Nationwide Danish Twin  
387 Register. *Biol. Psychiatry* **83**, 492–498 (2018).
- 388 32. Kessler, R. C. *et al.* The prevalence and correlates of nonaffective psychosis in the National Comorbidity Survey  
389 Replication (NCS-R). *Biol. Psychiatry* **58**, 668–676 (2005).
- 390 33. Moreno-Küstner, B., Martín, C. & Pastor, L. Prevalence of psychotic disorders and its association with methodological  
391 issues. A systematic review and meta-analyses. *PLOS ONE* **13**, e0195687 (2018).
- 392 34. Saha, S., Chant, D., Welham, J. & McGrath, J. A systematic review of the prevalence of schizophrenia. *PLoS Med.* **2**,  
393 e141 (2005).
- 394 35. Simeone, J. C., Ward, A. J., Rotella, P., Collins, J. & Windisch, R. An evaluation of variation in published estimates of  
395 schizophrenia prevalence from 1990–2013: a systematic literature review. *BMC Psychiatry* **15**, (2015).
- 396 36. Avila, M., Thaker, G. & Adami, H. Genetic epidemiology and schizophrenia: a study of reproductive fitness. *Schizophr.*  
397 *Res.* **47**, 233–241 (2001).
- 398 37. Bassett, A. S., Bury, A., Hodgkinson, K. A. & Honer, W. G. Reproductive fitness in familial schizophrenia. *Schizophr.*  
399 *Res.* **21**, 151–160 (1996).
- 400 38. Keller, M. C. & Miller, G. Resolving the paradox of common, harmful, heritable mental disorders: Which evolutionary  
401 genetic models work best? *Behav. Brain Sci.* **29**, 385–404 (2006).
- 402 39. MacCabe, J. H., Koupil, I. & Leon, D. A. Lifetime reproductive output over two generations in patients with psychosis  
403 and their unaffected siblings: the Uppsala 1915–1929 Birth Cohort Multigenerational Study. *Psychol. Med.* **39**, 1667  
404 (2009).
- 405 40. Liu, C., Overall, I., Pantelis, C. & Bousman, C. Interrogating the Evolutionary Paradox of Schizophrenia: A Novel  
406 Framework and Evidence Supporting Recent Negative Selection of Schizophrenia Risk Alleles. *Front. Genet.* **10**, (2019).
- 407 41. da Cruz, J. R. *et al.* Neural Compensation Mechanisms of Siblings of Schizophrenia Patients as Revealed by High-  
408 Density EEG. *Schizophr. Bull.* **46**, 1009–1018 (2020).
- 409 42. Favrod, O. *et al.* Electrophysiological correlates of visual backward masking in patients with first episode psychosis.  
410 *Psychiatry Res. Neuroimaging* **282**, 64–72 (2018).
- 411 43. Garobbio, S. A. *et al.* *Electrophysiological correlates of visual backward masking in patients with bipolar disorder.*  
412 <http://biorxiv.org/lookup/doi/10.1101/2020.05.12.090407> (2020) doi:10.1101/2020.05.12.090407.
- 413 44. da Cruz, J. R., Chicherov, V., Herzog, M. H. & Figueiredo, P. An automatic pre-processing pipeline for EEG analysis (APP)  
414 based on robust statistics. *Clin. Neurophysiol.* **129**, 1427–1437 (2018).
- 415 45. McIntosh, A. R., Chau, W. K. & Protzner, A. B. Spatiotemporal analysis of event-related fMRI data using partial least  
416 squares. *NeuroImage* **23**, 764–775 (2004).
- 417 46. Srebro, N. & Shraibman, A. Rank, Trace-Norm and Max-Norm. in *Learning Theory* (eds. Auer, P. & Meir, R.) 545–560  
418 (Springer, 2005). doi:10.1007/11503415\_37.
- 419 47. Abdi, H. Partial least squares regression and projection on latent structure regression (PLS Regression). *WIREs Comput.*  
420 *Stat.* **2**, 97–106 (2010).
- 421 48. Pedregosa, F. *et al.* Scikit-learn: Machine Learning in Python. *J. Mach. Learn. Res.* (2011).
- 422 49. Lachenbruch, P. A. & Mickey, M. R. Estimation of Error Rates in Discriminant Analysis. *Technometrics* **10**, 1–11 (1968).

It is made available under a [CC-BY-NC-ND 4.0 International license](#) .

- 423 50. Guyon, I., Weston, J., Barnhill, S. & Vapnik, V. Gene Selection for Cancer Classification using Support Vector Machines.  
424 *Mach. Learn.* **46**, 389–422 (2002).  
425
